# Supplementary material
Source: HighWire-hosted journal article supplement (https://jnm.snmjournals.org/highwire/filestream/94670/field_highwire_adjunct_files/0/148023_Supplemental_Data.pdf)
Supplement: 148023_Supplemental_Data.pdf [file 148023_Supplemental_Data.pdf]

## Supplemental Appendix 1

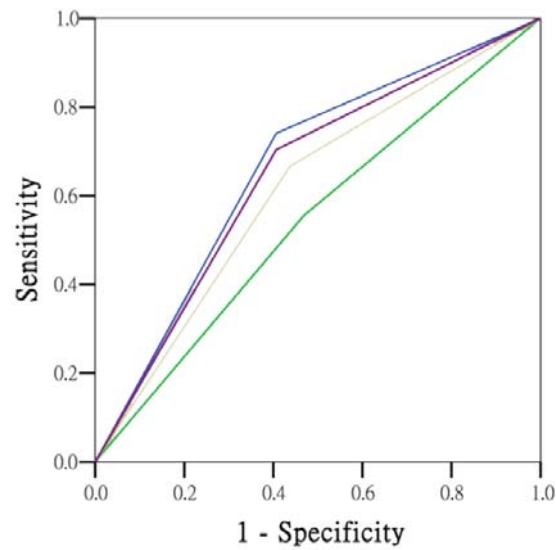

Figure 1. Receiver operating characteristic (ROC) curves were created to evaluate the predictive performance for nodal recurrence among N-MTV2.5, N-MTV50%, N-SUVmax, N-TLG40%, and N-TLG50%. The area under the curve was  $0.66 \pm 0.06$  for N-TLG40% (brown),  $0.62 \pm 0.06$  for N-TLG50% (purple),  $0.62 \pm 0.06$  for N-SUVmax (blue),  $0.55 \pm 0.07$  for N-MTV2.5 (green), and  $0.53 \pm 0.07$  for N-MTV50% (yellow), respectively.

## Supplemental Appendix 2

**Table 1**

Association between PET/CT- and CT-based parameters and initial response of neck lymph nodes using logistic regression analysis

| <b>Variables</b>                 | <b>OR</b> | <b>95% CI</b> | <b>P</b> |
|----------------------------------|-----------|---------------|----------|
| <b>N-classification</b>          |           |               |          |
| N1-2 vs. N3                      | 2.86      | 0.42-19.60    | 0.29     |
| N1 vs. N2-3                      | 1.73      | 0.27-11.23    | 0.57     |
| <b>CT-related parameters</b>     |           |               |          |
| central necrosis                 |           |               |          |
| no vs. yes                       | 10.10     | 3.03-34.48    | < 0.001  |
| maximal diameter (cm)            |           |               |          |
| < 2.4 vs. $\geq$ 2.4             | 2.42      | 0.20-28.97    | 0.49     |
| N-GTV (ml)                       |           |               |          |
| < 8.9 vs. $\geq$ 8.9             | 3.32      | 1.16-9.48     | 0.025    |
| <b>PET/CT-related parameters</b> |           |               |          |
| N-TLG40% (g)                     |           |               |          |
| < 38.0 vs. $\geq$ 38.0g          | 1.79      | 0.50-6.46     | 0.37     |
| N-SUVmax                         |           |               |          |
| < 6.1 vs. $\geq$ 6.1             | 1.30      | 0.23-7.36     | 0.76     |
| N-MTV2.5 (ml)                    |           |               |          |
| < 3.0 vs. $\geq$ 3.0             | 2.71      | 0.49-14.92    | 0.25     |

Supplemental Appendix 3

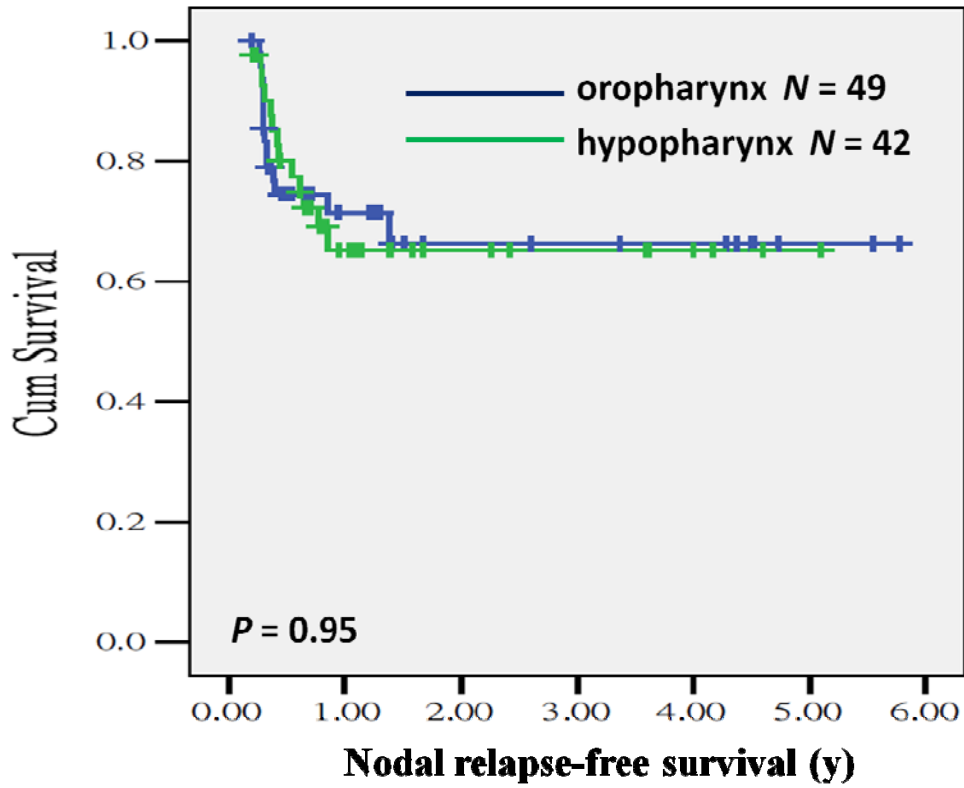

Figure 2. Nodal relapse-free survival according to the origin of primary tumor ( $P = 0.95$ ).
